# Supplementary material
Source: Springer Nature journal article supplement (https://www.springermedizin.de/resource/supplementary/12957_2011_971_MOESM3_ESM.pdf/9562098)

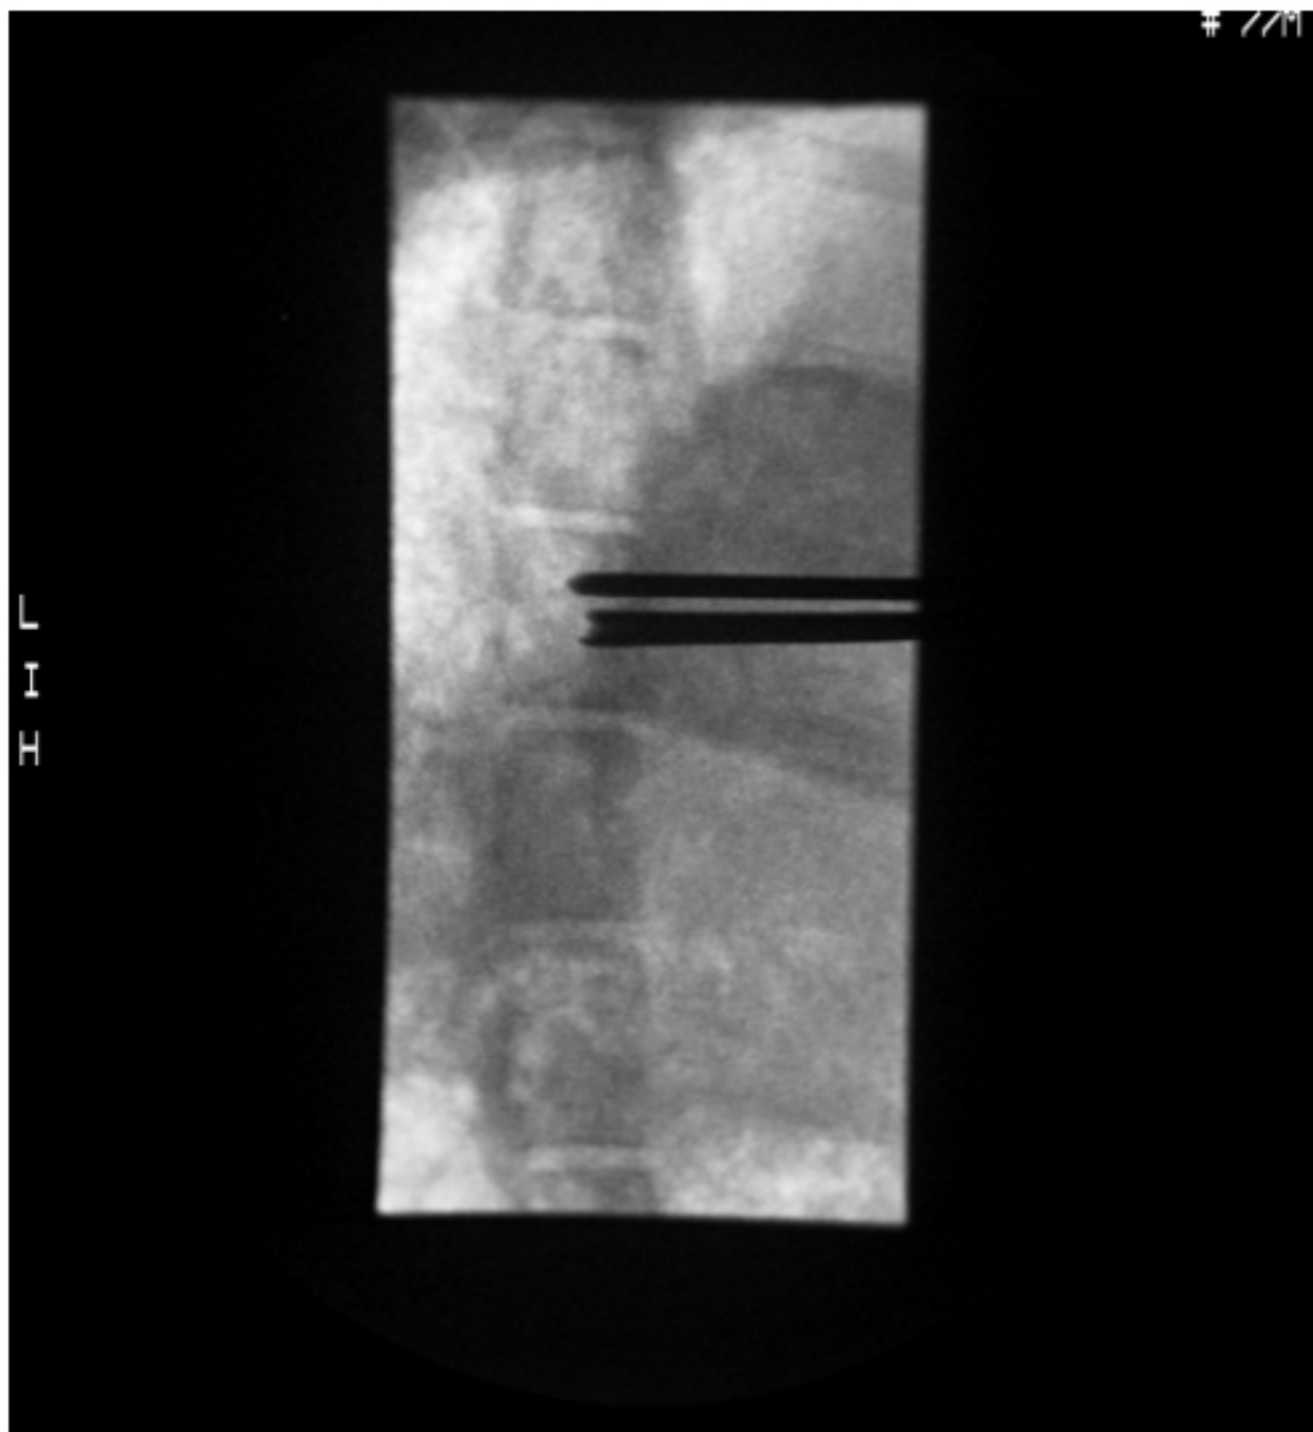

a

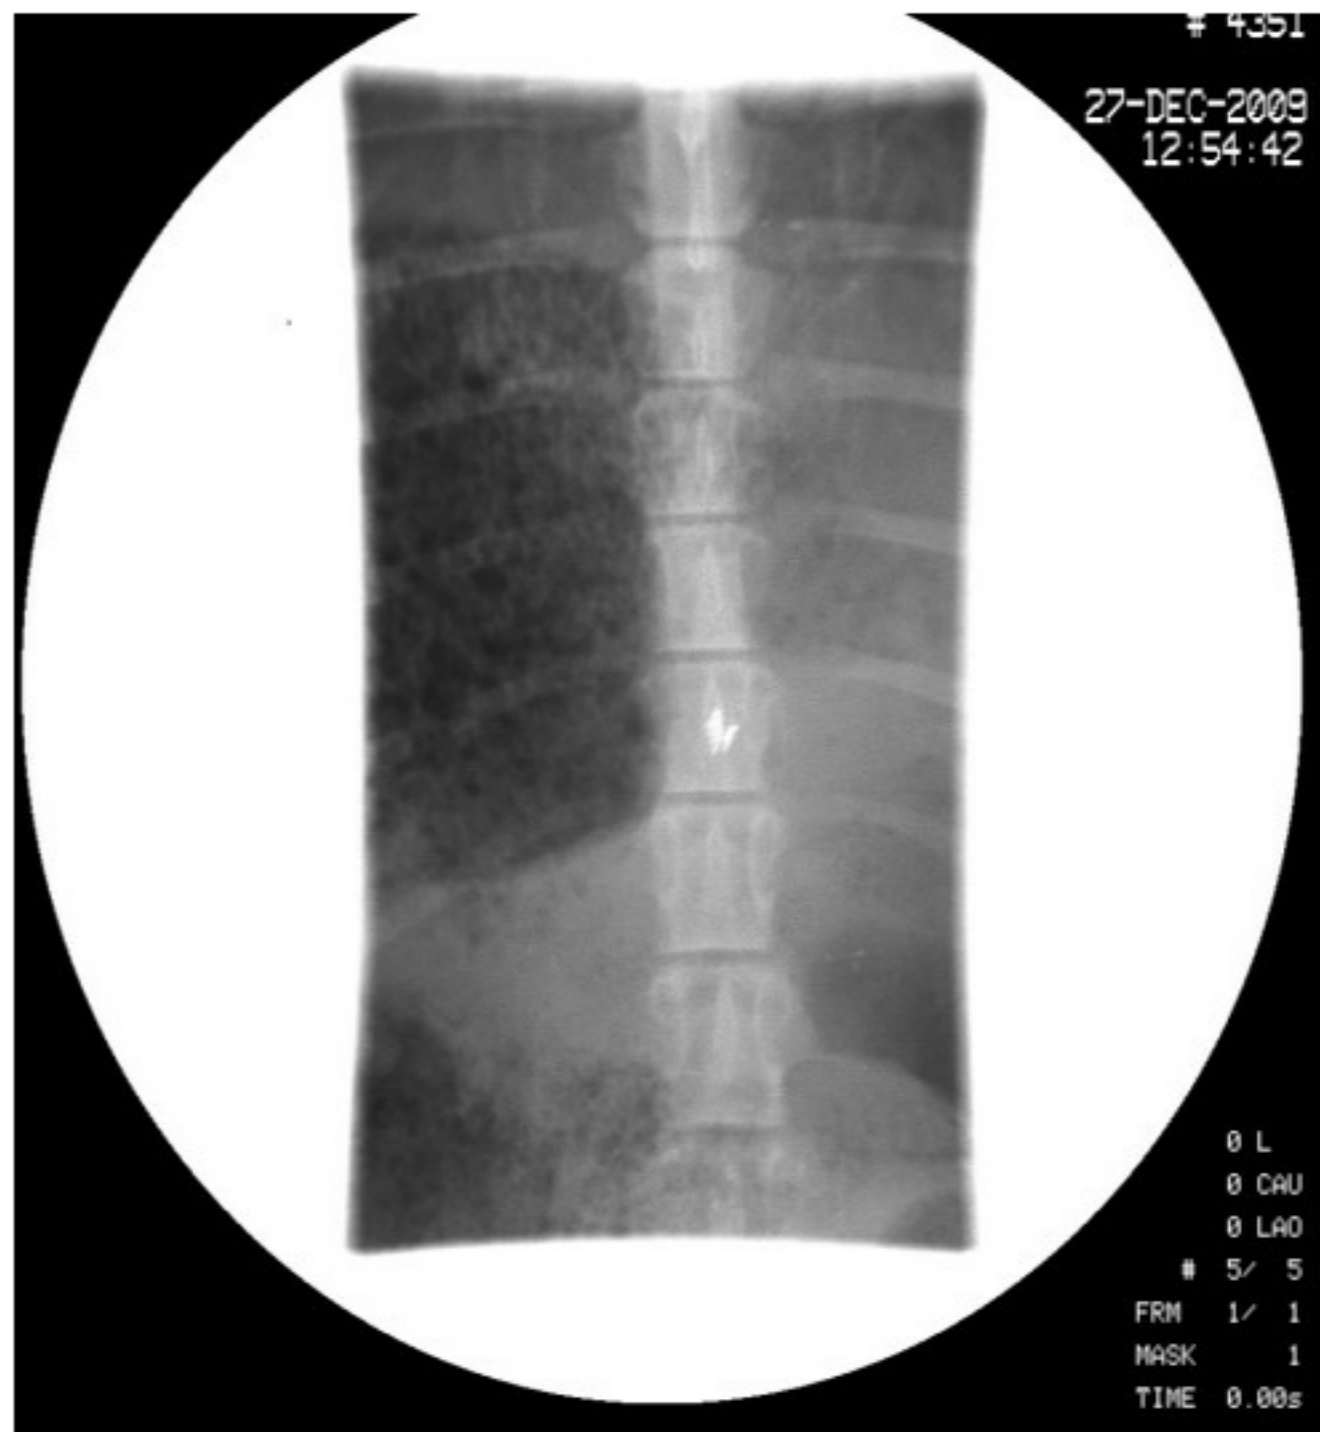

b

Supplement: MOESM3 [file 9562098]
